# Supplementary material for: A Multicenter, Randomized, Double-Blinded, Placebo-Controlled Clinical Trial to Evaluate the Efficacy and Safety of a Krill Oil, Astaxanthin, and Oral Hyaluronic Acid Complex on Joint Health in People with Mild Osteoarthritis
Source: MDPI journal article supplement (doi:10.3390/nu15173769), 2023-08-29
Supplement: s1 [file s1]

**A Multicenter, Randomized, Double-Blinded, Placebo-Controlled Clinical Trial to Evaluate the Efficacy and Safety of a Krill Oil, Astaxanthin, and Oral Hyaluronic Acid Complex on Joint Health in People with Mild Osteoarthritis**

W. Stephen Hill, Margaret H. Dohnalek, YeJin Ha, Seok Jung Kim, Jae-Chul Jung,  
and Seung-Baik Kang

**Supplementary Tables S1–S4**

**Table S1. Hematologic Tests (Safety Set)**

|                                            |                      | FP-MD |                     | Placebo |              | p-value                 |
|--------------------------------------------|----------------------|-------|---------------------|---------|--------------|-------------------------|
|                                            |                      | n     | Mean±SD             | n       | Mean±SD      |                         |
| WBC<br>(10 <sup>3</sup> /μL)               | Baseline             | 50    | 5.77±1.35           | 50      | 5.56±1.40    | 0.2159 <sup>&amp;</sup> |
|                                            | Week 12              | 48    | 5.85±1.43           | 45      | 5.68±1.28    |                         |
|                                            | Change from baseline | 48    | 0.08±0.87           | 45      | 0.05±1.21    | 0.8813*                 |
|                                            | p-value**            |       | 0.5199              |         | 0.7900       |                         |
| RBC<br>(10 <sup>6</sup> /μL)               | Baseline             | 50    | 4.54±0.39           | 50      | 4.59±0.48    | 0.9533 <sup>&amp;</sup> |
|                                            | Week 12              | 48    | 4.49±0.40           | 45      | 4.51±0.46    |                         |
|                                            | Change from baseline | 48    | -0.04±0.21          | 45      | -0.07±0.18   | 0.4987*                 |
|                                            | p-value**            |       | 0.1741              |         | 0.0117       |                         |
| Hb<br>(g/dL)                               | Baseline             | 50    | 14.12±1.35          | 50      | 14.21±1.48   | 0.9395 <sup>&amp;</sup> |
|                                            | Week 12              | 48    | 13.94±1.39          | 45      | 13.97±1.36   |                         |
|                                            | Change from baseline | 48    | -0.16±0.66          | 45      | -0.28±0.54   | 0.3400*                 |
|                                            | p-value**            |       | 0.0964              |         | 0.0011       |                         |
| Hct<br>(%)                                 | Baseline             | 50    | 41.99±3.32          | 50      | 42.13±3.77   | 0.9807 <sup>&amp;</sup> |
|                                            | Week 12              | 48    | 41.50±3.33          | 45      | 41.39±3.62   |                         |
|                                            | Change from baseline | 48    | -0.43±1.74          | 45      | -0.80±1.59   | 0.2838*                 |
|                                            | p-value**            |       | 0.0941              |         | 0.0015       |                         |
| Platelet<br>count<br>(10 <sup>3</sup> /μL) | Baseline             | 50    | 239.88±44.96        | 50      | 227.94±43.18 | 0.1787*                 |
|                                            | Week 12              | 48    | 238.15±50.40        | 45      | 221.67±47.08 |                         |
|                                            | Change from baseline | 48    | -0.81±22.03         | 45      | -4.93±22.74  | 0.3771*                 |
|                                            | p-value**            |       | 0.7994              |         | 0.1526       |                         |
| Neutrophil<br>(%)                          | Baseline             | 50    | 52.86±9.32          | 50      | 50.72±9.06   | 0.2474*                 |
|                                            | Week 12              | 48    | 51.11±8.13          | 45      | 50.86±8.55   |                         |
|                                            | Change from baseline | 48    | -1.81±7.70          | 45      | 0.42±8.04    | 0.6391 <sup>&amp;</sup> |
|                                            | p-value              |       | 0.3410 <sup>#</sup> |         | 0.7304**     |                         |
| Lymphocyte<br>(%)                          | Baseline             | 50    | 36.99±8.97          | 50      | 39.16±8.16   | 0.2104*                 |
|                                            | Week 12              | 48    | 38.76±7.63          | 45      | 39.12±7.40   |                         |
|                                            | Change from baseline | 48    | 1.72±6.64           | 45      | -0.29±7.22   | 0.5284 <sup>&amp;</sup> |
|                                            | p-value              |       | 0.2747 <sup>#</sup> |         | 0.7881**     |                         |
| Monocyte<br>(%)                            | Baseline             | 50    | 7.05±1.89           | 50      | 7.09±1.61    | 0.9176 <sup>&amp;</sup> |
|                                            | Week 12              | 48    | 7.06±1.62           | 45      | 7.12±1.58    |                         |
|                                            | Change from baseline | 48    | 0.00±1.77           | 45      | 0.00±1.46    | 0.9571 <sup>&amp;</sup> |

|                | p-value               |    | 0.7811 <sup>#</sup> |    | 0.9919 <sup>**</sup> |                         |
|----------------|-----------------------|----|---------------------|----|----------------------|-------------------------|
| Eosinophil (%) | Baseline              | 50 | 2.55±1.86           | 50 | 2.48±1.92            | 0.9642 <sup>&amp;</sup> |
|                | Week 12               | 48 | 2.51±2.13           | 45 | 2.35±1.97            |                         |
|                | Change from baseline  | 48 | 0.07±1.39           | 45 | -0.12±1.34           | 0.8027 <sup>&amp;</sup> |
|                | p-value <sup>#</sup>  |    | 0.8047              |    | 0.4684               |                         |
| Basophil (%)   | Baseline              | 50 | 0.55±0.26           | 50 | 0.56±0.33            | 0.8078 <sup>&amp;</sup> |
|                | Week 12               | 48 | 0.56±0.25           | 45 | 0.55±0.32            |                         |
|                | Change from baseline  | 48 | 0.02±0.22           | 45 | -0.01±0.26           | 0.5462 <sup>*</sup>     |
|                | p-value <sup>**</sup> |    | 0.5541              |    | 0.7731               |                         |

\*Compared between groups; p-value based on 2-sample *t*-test.

&Compared between groups; p-value based on Wilcoxon rank-sum test.

\*\*Compared within groups; p-value based on paired *t*-test.

#Compared within groups; p-value based on Wilcoxon signed-rank test.

**Table S2. Blood Chemistry and Lipid Tests (Safety Set)**

|                              |                       | <b>FP-MD<br/>N=50</b> |                     | <b>Placebo<br/>N=50</b> |                      | <b>p-value</b>          |
|------------------------------|-----------------------|-----------------------|---------------------|-------------------------|----------------------|-------------------------|
|                              |                       | <b>n</b>              | <b>Mean±SD</b>      | <b>n</b>                | <b>Mean±SD</b>       |                         |
| Glucose<br>(mg/dL)           | Baseline              | 50                    | 103.32±22.82        | 50                      | 105.94±17.10         | 0.2564 <sup>&amp;</sup> |
|                              | Week 12               | 48                    | 102.44±14.56        | 45                      | 107.76±19.57         |                         |
|                              | Change from baseline  | 48                    | -1.00±15.28         | 45                      | 0.87±13.03           | 0.6777 <sup>&amp;</sup> |
|                              | p-value <sup>#</sup>  |                       | 0.7694              |                         | 0.8167               |                         |
| AST(GOT)<br>(IU/L)           | Baseline              | 50                    | 24.72±7.63          | 50                      | 25.88±12.44          | 0.8845 <sup>&amp;</sup> |
|                              | Week 12               | 48                    | 23.17±5.76          | 45                      | 25.07±11.03          |                         |
|                              | Change from baseline  | 48                    | -1.75±5.74          | 45                      | -0.82±6.10           | 0.2766 <sup>&amp;</sup> |
|                              | p-value <sup>#</sup>  |                       | 0.0187              |                         | 0.4404               |                         |
| ALT(GPT)<br>(IU/L)           | Baseline              | 50                    | 23.92±10.08         | 50                      | 25.40±15.51          | 0.5164 <sup>&amp;</sup> |
|                              | Week 12               | 48                    | 22.69±9.42          | 45                      | 24.47±15.11          |                         |
|                              | Change from baseline  | 48                    | -1.58±7.61          | 45                      | -1.38±11.24          | 0.5224 <sup>&amp;</sup> |
|                              | p-value <sup>#</sup>  |                       | 0.0280              |                         | 0.4404               |                         |
| Creatinine<br>(mg/dL)        | Baseline              | 50                    | 0.82±0.22           | 50                      | 0.83±0.22            | 0.9161 <sup>*</sup>     |
|                              | Week 12               | 48                    | 0.84±0.21           | 45                      | 0.83±0.21            |                         |
|                              | Change from baseline  | 48                    | 0.02±0.09           | 45                      | -0.01±0.08           | 0.1076 <sup>*</sup>     |
|                              | p-value <sup>**</sup> |                       | 0.1473              |                         | 0.4315               |                         |
| Triglyceride<br>(mg/dL)      | Baseline              | 50                    | 128.56±105.57       | 50                      | 124.60±73.36         | 0.9368 <sup>&amp;</sup> |
|                              | Week 12               | 48                    | 126.25±59.17        | 45                      | 126.02±78.31         |                         |
|                              | Change from baseline  | 48                    | -2.67±103.34        | 45                      | 1.62±66.09           | 0.2304 <sup>&amp;</sup> |
|                              | p-value <sup>#</sup>  |                       | 0.3225              |                         | 0.5370               |                         |
| Total Cholesterol<br>(mg/dL) | Baseline              | 50                    | 199.10±42.85        | 50                      | 192.22±29.26         | 0.3511 <sup>*</sup>     |
|                              | Week 12               | 48                    | 190.69±38.38        | 45                      | 188.07±26.92         |                         |
|                              | Change from baseline  | 48                    | -9.60±30.08         | 45                      | -6.64±20.79          | 0.7321 <sup>&amp;</sup> |
|                              | p-value               |                       | 0.1211 <sup>#</sup> |                         | 0.0376 <sup>**</sup> |                         |
| HDL-Cholesterol<br>(mg/dL)   | Baseline              | 50                    | 57.84±13.95         | 50                      | 57.70±13.52          | 0.7747 <sup>&amp;</sup> |
|                              | Week 12               | 48                    | 56.81±11.42         | 45                      | 55.78±12.75          |                         |
|                              | Change from baseline  | 48                    | -1.56±8.57          | 45                      | -1.98±7.51           | 0.4460 <sup>&amp;</sup> |
|                              | p-value               |                       | 0.3806 <sup>#</sup> |                         | 0.0843 <sup>**</sup> |                         |
| LDL-Cholesterol<br>(mg/dL)   | Baseline              | 50                    | 116.50±37.26        | 50                      | 110.62±27.32         | 0.3983 <sup>&amp;</sup> |
|                              | Week 12               | 48                    | 111.44±35.61        | 45                      | 109.91±27.64         |                         |
|                              | Change from baseline  | 48                    | -5.69±29.89         | 45                      | -2.89±17.98          | 0.7760 <sup>&amp;</sup> |
|                              | p-value               |                       | 0.5536 <sup>#</sup> |                         | 0.2870 <sup>**</sup> |                         |
| Uric acid<br>(mg/dL)         | Baseline              | 50                    | 5.05±1.19           | 50                      | 5.27±1.59            | 0.7906 <sup>&amp;</sup> |
|                              | Week 12               | 48                    | 4.95±1.19           | 45                      | 5.42±1.77            |                         |
|                              | Change from baseline  | 48                    | -0.13±0.77          | 45                      | 0.16±0.68            | 0.0646 <sup>*</sup>     |
|                              | p-value <sup>**</sup> |                       | 0.2612              |                         | 0.1295               |                         |

\*Compared between groups; p-value based on 2-sample *t*-test.

&Compared between groups; p-value based on Wilcoxon rank-sum test.

\*\*Compared within groups; p-value based on paired *t*-test.

#Compared within groups; p-value based on Wilcoxon signed-rank test.

**Table S3. Vital Signs and Body Weight (Safety Set)**

|                                           |                       | FP-MD |                     | Placebo |                      |                         |
|-------------------------------------------|-----------------------|-------|---------------------|---------|----------------------|-------------------------|
|                                           |                       | N=50  |                     | N=50    |                      | p-value                 |
|                                           |                       | n     | Mean±SD             | n       | Mean±SD              |                         |
| Pulse<br>(bpm)                            | Baseline              | 50    | 72.44±10.23         | 50      | 74.50±9.67           | 0.2448 <sup>&amp;</sup> |
|                                           | Week 6                | 49    | 72.92±9.07          | 46      | 75.48±7.99           |                         |
|                                           | Change from baseline  | 49    | 0.88±6.88           | 46      | 0.87±8.72            | 0.9960 <sup>*</sup>     |
|                                           | p-value <sup>**</sup> |       | 0.3767              |         | 0.5023               |                         |
|                                           | Week 12               | 48    | 70.52±8.37          | 45      | 72.93±7.87           |                         |
|                                           | Change from baseline  | 48    | -1.77±6.32          | 45      | -1.96±7.54           | 0.8981 <sup>*</sup>     |
|                                           | p-value <sup>**</sup> |       | 0.0581              |         | 0.0888               |                         |
| Systolic<br>blood<br>pressure<br>(mm Hg)  | Baseline              | 50    | 128.52±11.71        | 50      | 129.28±9.09          | 0.8091 <sup>&amp;</sup> |
|                                           | Week 6                | 49    | 129.67±10.78        | 46      | 128.70±10.18         |                         |
|                                           | Change from baseline  | 49    | 1.06±12.33          | 46      | -0.78±8.74           | 0.4007 <sup>*</sup>     |
|                                           | p-value <sup>**</sup> |       | 0.5498              |         | 0.5468               |                         |
|                                           | Week 12               | 48    | 126.92±12.44        | 45      | 127.47±8.79          |                         |
|                                           | Change from baseline  | 48    | -1.75±10.75         | 45      | -2.47±9.18           | 0.7311 <sup>*</sup>     |
|                                           | p-value <sup>**</sup> |       | 0.2650              |         | 0.0783               |                         |
| Diastolic<br>blood<br>pressure<br>(mm Hg) | Baseline              | 50    | 82.36±8.93          | 50      | 82.58±8.48           | 0.8997 <sup>*</sup>     |
|                                           | Week 6                | 49    | 82.10±7.66          | 46      | 81.41±8.85           |                         |
|                                           | Change from baseline  | 49    | -0.61±7.11          | 46      | -1.33±8.54           | 0.6582 <sup>*</sup>     |
|                                           | p-value <sup>**</sup> |       | 0.5494              |         | 0.2981               |                         |
|                                           | Week 12               | 48    | 80.88±8.63          | 45      | 81.38±8.12           |                         |
|                                           | Change from baseline  | 48    | -1.88±6.83          | 45      | -1.76±7.37           | 0.9355 <sup>*</sup>     |
|                                           | p-value <sup>**</sup> |       | 0.0635              |         | 0.1171               |                         |
| Weight<br>(kg)                            | Baseline              | 50    | 65.02±11.02         | 50      | 64.70±13.72          | 0.5192 <sup>&amp;</sup> |
|                                           | Week 6                | 49    | 65.26±11.19         | 46      | 64.75±13.60          |                         |
|                                           | Change from baseline  | 49    | 0.32±1.28           | 46      | 0.19±0.79            | 0.8639 <sup>&amp;</sup> |
|                                           | p-value               |       | 0.1588 <sup>#</sup> |         | 0.1123 <sup>**</sup> |                         |
|                                           | Week 12               | 48    | 64.25±11.34         | 45      | 64.48±13.69          |                         |
|                                           | Change from baseline  | 48    | -0.29±2.07          | 45      | -0.43±2.36           | 0.3101 <sup>&amp;</sup> |
|                                           | p-value <sup>#</sup>  |       | 0.0578              |         | 0.5362               |                         |

\*Compared between groups; p-value based on 2-sample *t*-test.

&Compared between groups; p-value based on Wilcoxon rank-sum test.

\*\*Compared within groups; p-value based on paired *t*-test.

#Compared within groups; p-value based on Wilcoxon signed-rank test.

**Table S4. ECG Evaluation (Safety Set)**

|                   |                 | <b>Week 12</b>          |                           |
|-------------------|-----------------|-------------------------|---------------------------|
|                   | <b>Baseline</b> | <b>Normal<br/>n (%)</b> | <b>Abnormal<br/>n (%)</b> |
| FP-MD<br>(n=48)   | Normal          | 48 (100)                | 0 (0)                     |
|                   | Abnormal        | 0 (0)                   | 0 (0)                     |
| Placebo<br>(n=45) | Normal          | 45 (100)                | 0 (0)                     |
|                   | Abnormal        | 0 (0)                   | 0 (0)                     |
